# Supplementary material for: A SUDS Planning Decision Support Tool to Maximize Ecosystem Services
Source: MDPI journal article supplement (doi:10.3390/su14084560), 2022-04-11
Supplement: s1 [file s1]

## Supplementary File S2

### Priority index per ecosystem services

#### Ciudad Verde

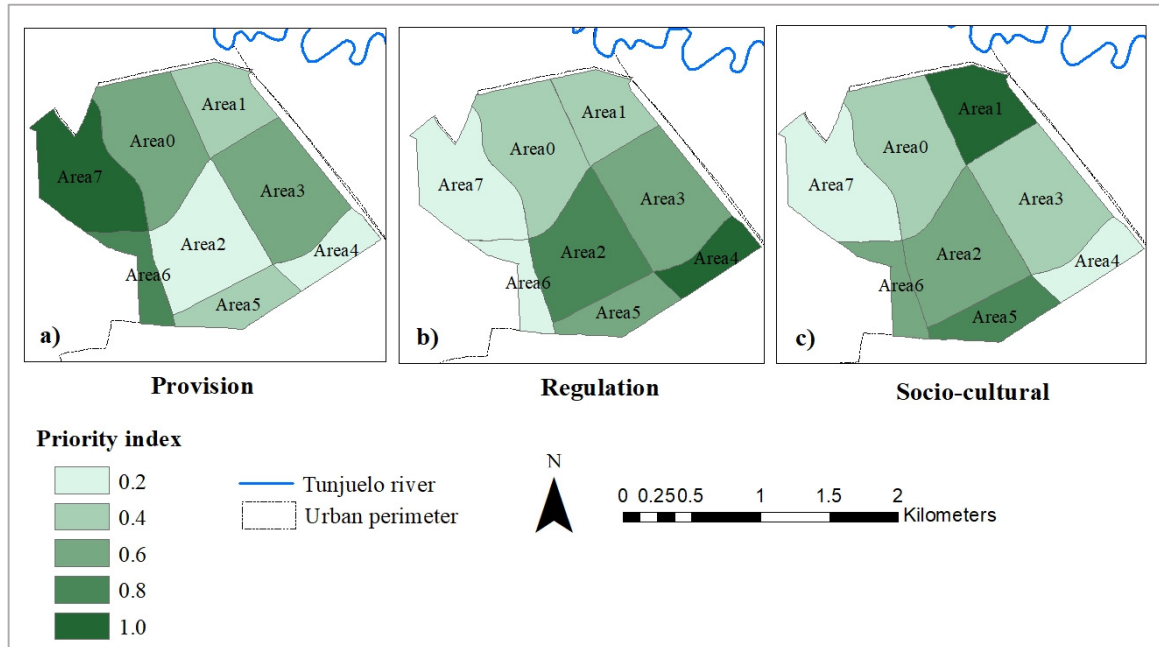

**Figure S1.** Priority areas of (a) provision services, (b) regulation services, (c) socio-cultural services – Ciudad Verde

Figure S1 presents the distribution of ecosystem services on *Ciudad Verde*. The areas with a higher scarcity of socio-cultural, regulation, and provision services are Area 1, 4, and 7, respectively. Area 1 had a lack of socio-cultural services mainly because of the low proportion of parks per citizen that affect the aesthetic value of the zone. Area 4, is the area with the highest demand for regulation services, due to the high presence of highways, impervious areas combined with a lower proportion of green areas. Finally, Area 7 present a lack of providing services because it has the highest proportion of parks and green areas demanding water for irrigation.

## Lagos de Torca

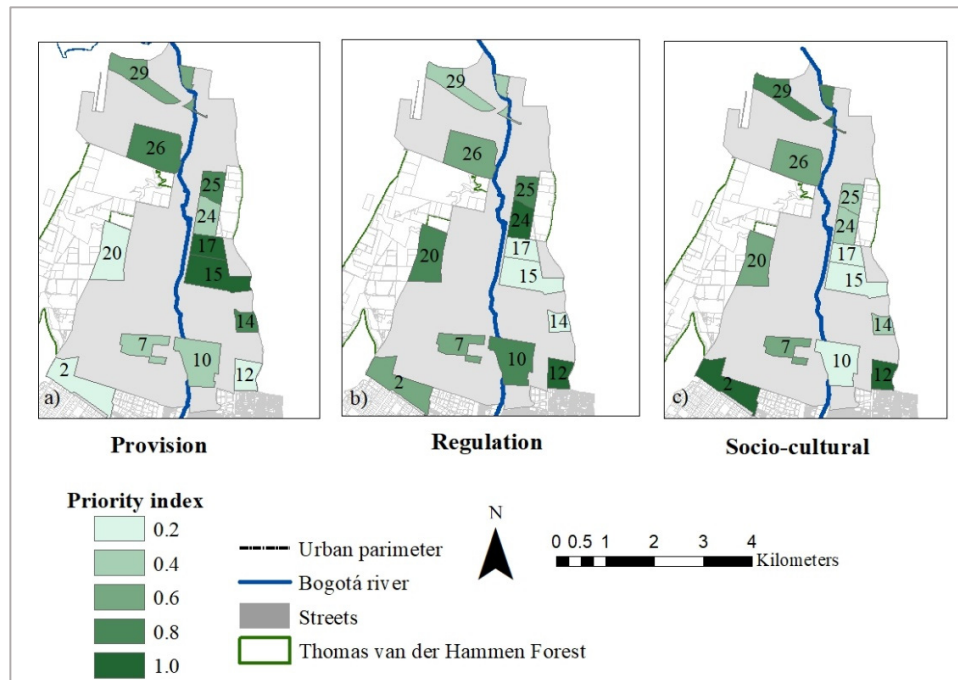

**Figure S2.** Priority areas of (a) provision services, (b) regulation services, (c) socio-cultural services – Lagos de Torca

Figure S2 present the distribution of ecosystem services on *Lagos de Torca*. The areas with a higher scarcity of socio-cultural, regulation, and provision services are Area 12 (*Tibabita*), 24 (*Santa María*), and 17 (*Lucerna*), respectively. Area 12 present a lack of socio-cultural services because of the low proportion of parks per citizen that affect the aesthetic value of the zone and the high household density that affect the educative value. Area 24, is the area with the highest demand for regulation services specifically water regulation services (e.g., water regulation and water treatment) and microclimate regulation. These results are related to the high run-off coefficient combined with a high flood risk. Finally, Area 17 present a lack of providing services because have the highest proportion of parks and green areas that required water for irrigation.

### *El Reencuentro*

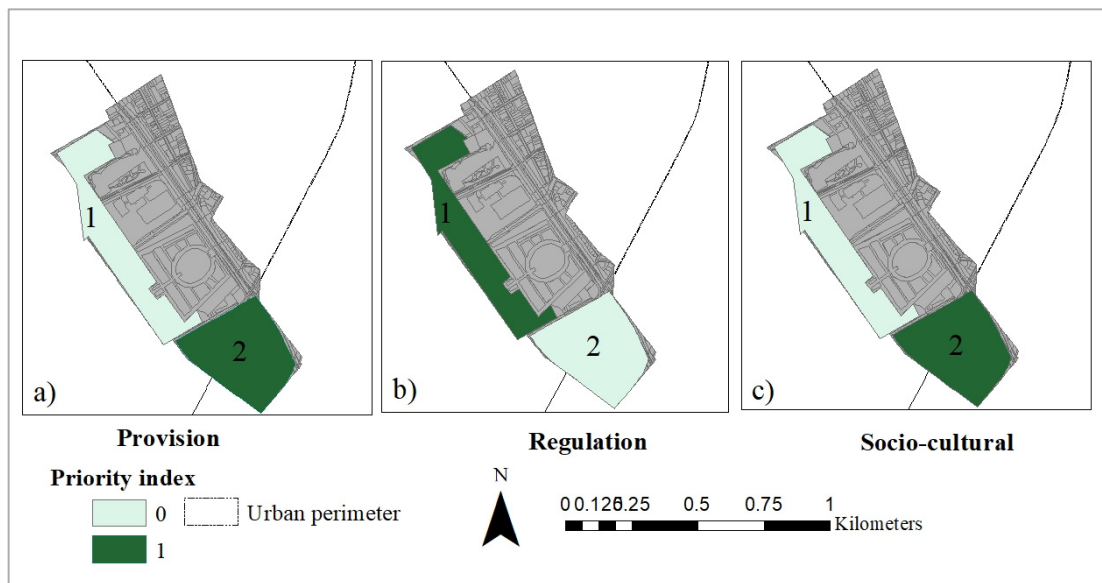

**Figure S3.** Priority areas of (a) provision services, (b) regulation services, (c) socio-cultural services – El Reencuentro

Figure S3 present the distribution of ecosystem services on *El Reencuentro*. The Area 2 (Calle 26) is the area with the highest scarcity of socio-cultural and provision services and Area 1 (Calle 24) presents a lack of regulation services. Area 2 has a high presence of green areas, which requires more water for irrigation affecting the provision of services and a high distance to key infrastructures, which implies a scarcity in provisioning and socio-cultural services. On the other hand, Area 1 had a great demand for regulation services, due to the lack of green areas in the zone.
