# Supplementary material for: A SUDS Planning Decision Support Tool to Maximize Ecosystem Services
Source: MDPI journal article supplement (doi:10.3390/su14084560), 2022-04-11
Supplement: s1 [file s1]

## Supplementary File S3

### Opporcunity index per ecosystem service

#### Ciudad Verde

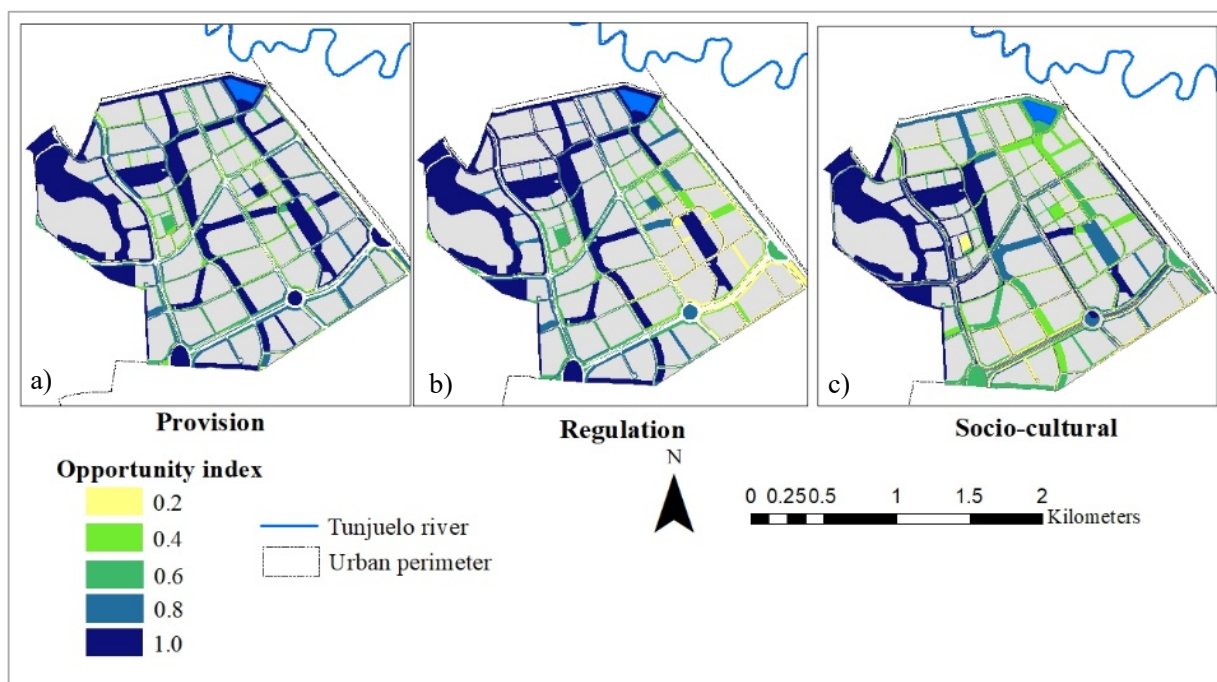

**Figure S1.** Opportunity zones of (a) provision services, (b) regulation services, (c) socio-cultural services – *Ciudad Verde*

Figure S1 presents the potential for ecosystem services provision in Ciudad Verde. According to this Figure, provision services potential is equally distributed among all the zones. This evidence that the distance of the intervention zones to the principal roads of the project had a low potential to pollute water run-off. On the other hand, regulation services have a high generation potential on the northwest of the project because of the presence of green public spaces (Figure S1 – Area 6 and 7). Finally, socio-cultural services are mostly promoted in Area 7 also associated with the presence of green areas.

Lagos de Torca- El Bosque

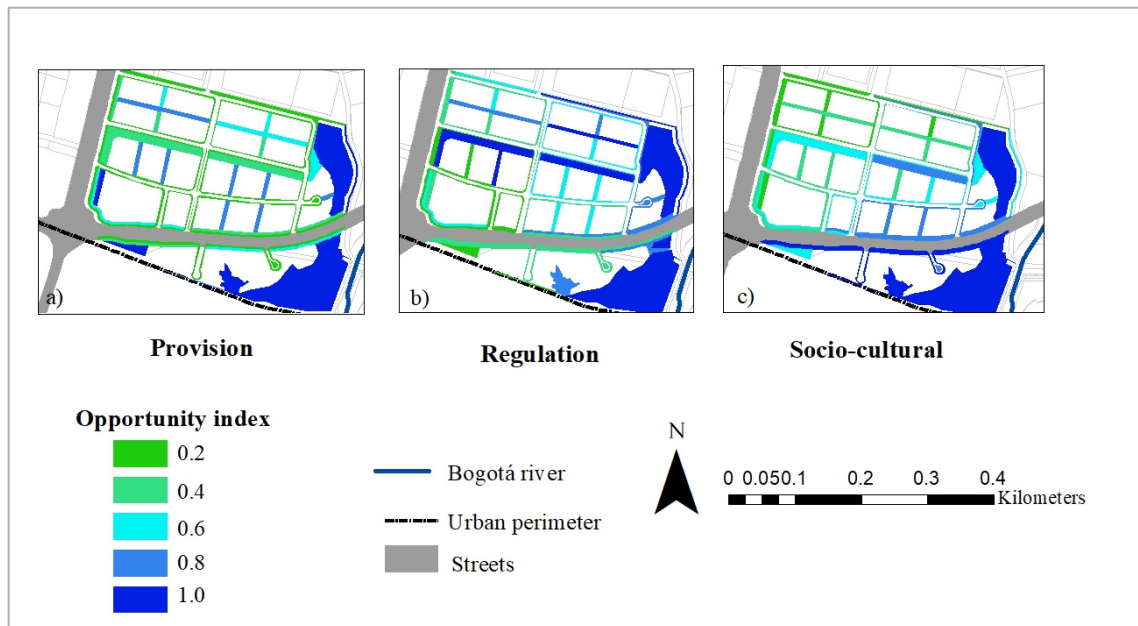

**Figure S2.** Opportunity zones of **(a)** provision services, **(b)** regulation services, **(c)** socio-cultural services – *Lagos de Torca- El Bosque*

Figure S2 shows that, all services categories have a high potential generation in the surroundings of *Paque Guaymaral* because the presence of this ecosystem promotes the quality of run-off, regulation services due to the presence of green areas, and vegetation, and is considered a space for urban interaction.

Lagos de Torca - Tibabita

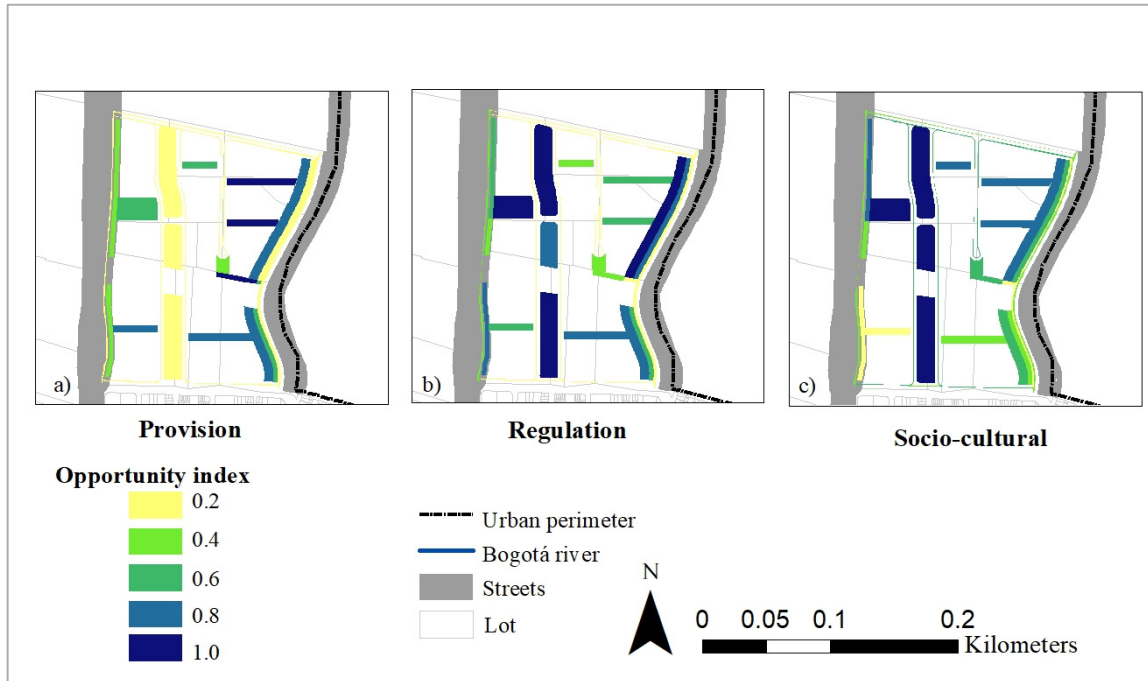

**Figure S3.** Opportunity zones of (a) provision services, (b) regulation services, (c) socio-cultural services – Lagos de Torca- Tibabita

Figure S3 evidence that provision services are limited to be promoted in public space, while regulation and socio-cultural services have a higher potential in the central zone of the project due to the presence of larger green areas.

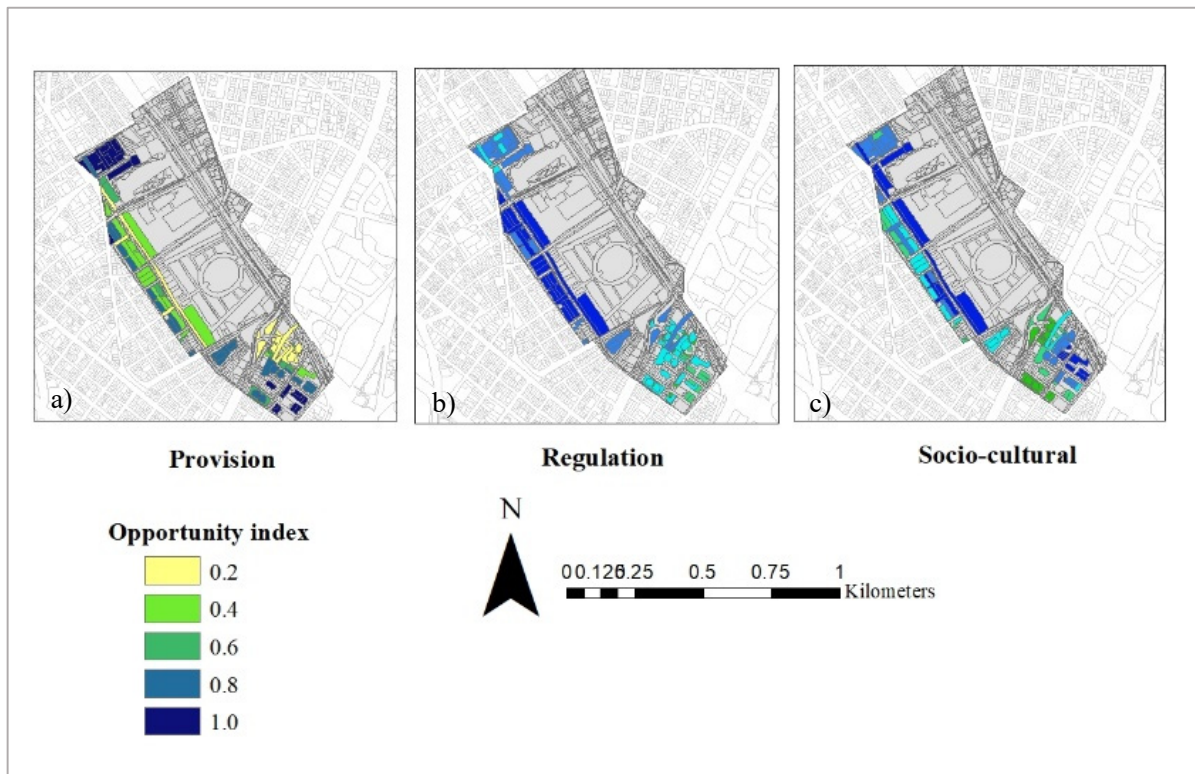

**Figure S4.** Opportunity zones of (a) provision services, (b) regulation services, (c) socio-cultural services – *El Reencuentro*

The Figure shows a low potential for provision services generation in the implementation zones because the project is surrounded by principal roads that affect run-off quality. In addition, regulation and socio-cultural services had a higher potential on Area 2 (south zone) in which distance to green areas and key infrastructure is lower.
